# Supplementary material for: Protection Genes in Nucleus Accumbens Shell Affect Vulnerability to Nicotine Self-Administration across Isogenic Strains of Adolescent Rat
Source: PLoS One. 2014 Jan 22;9(1):e86214. doi: 10.1371/journal.pone.0086214 (PMC3899218; doi:10.1371/journal.pone.0086214)
Supplement: Table S1 — Sample RNA quality and mapping statistics. (XLS) [file pone.0086214.s001.xls]

## Sheet: Table_S1
Table S1. Sample RNA quality and mapping statistics
Strain	n	RIN			Concentration (pg/ul)			Mapped Reads (millions)			Percent Mapped
Shell
B	4	8.4	±	0	991.3	±	50	17.3	±	1.2	59.3	±	0.6
D	4	7.5	±	0.1	816.8	±	40	36.5	±	7.8	56.2	±	0.4
F	4	8.1	±	0.1	1099.7	±	88.8	16.7	±	1	60.5	±	0.5
FL	2	7.2	±	0.1	727.5	±	75.3	17.8	±	0.3	58	±	1
FS	2	7.8	±	0.1	710	±	55.2	15.1	±	8	55.7	±	0.4
L	4	8	±	0.2	957.3	±	52.8	20.2	±	0.2	58	±	0.8
S	4	7.9	±	0.2	895.7	±	42.8	24.3	±	2.1	56.9	±	0.8
SL	4	8	±	0.1	692	±	41.8	20.5	±	2.7	55.6	±	0.7
W	4	8	±	0.1	942.5	±	100.8	22.2	±	1.7	59.8	±	0.8
WL	4	8.3	±	0	621	±	47.5	18.3	±	1.5	54	±	0.5
